# Supplementary material for: Mechanical confinement triggers glioma linear migration dependent on formin FHOD3
Source: PubMed Central journal article supplement — Mol Biol Cell. 2016 Apr 15;27(8):1246–61. doi: 10.1091/mbc.E15-08-0565 (PMC4831879; doi:10.1091/mbc.e15-08-0565), 2016-04-15
Supplement: supp_E15-08-0565v1_CombinedSupMats.pdf [file supp_E15-08-0565v1_CombinedSupMats.pdf]

# Supplemental Materials

*Molecular Biology of the Cell*

Monzo et al.

## LEGENDS FOR SUPPLEMENTAL FIGURES

### **Supplemental Figure 1. Comparison of C6 glioma cells migrating on laminin coated lines of different width.**

(A) Snapshot of C6 cells migrating on laminin micropatterned lines of different sizes. For 3-7  $\mu\text{m}$  lines C6 glioma cells were seeded and imaged in phase contrast. For 20  $\mu\text{m}$  lines, cells were pre-incubated with Hoechst 33342 to label the nuclei (blue). For 100  $\mu\text{m}$  lines, cells were transfected with GFP to label the edge of the cells. (B) Average of mean speed ( $\mu\text{m}/\text{h}$ ) on laminin micropatterned lines of different sizes. Error bars are S.E.M. P-values were calculated using unpaired t-tests.

### **Supplemental Figure 2. Paxillin-containing adhesion tracking.**

Paxillin-containing adhesions were tracked in the tail and at the front. Data extracted from the movie # 6. (A) Montage of the overlay of the tracks and the paxillin movie during trail retraction. (B) Montage of the overlay of the tracks and the paxillin movie during front advancement. (C-D) Adhesion track projections obtained with ImageJ. See also supplemental movies 5-6.

### **Supplemental Figure 3. Mechanical constraint mediated by an increase in cell density triggers glioma linear migration dependent on laminin.**

(A) Schematic of the laminin pattern consisting of a large rectangle (reservoir) joined to strips of widths varying from 10 $\mu\text{m}$  (line 1) to 400 $\mu\text{m}$  (line 12). (B) C6 glioma cells pre-incubated with Hoechst 33342 to label the nuclei were plated on the pattern coated with laminin (500  $\mu\text{g}/\text{ml}$ ). Cells were imaged for long periods of time (15-20h) (1 image/ 6 min). Images of cells migrating on the reservoir and on the lines. Zooms showing the shape of glioma cells when migrating in the reservoir (a), on a 70 $\mu\text{m}$  line (b) and on a 20 $\mu\text{m}$  line (c). (C) Tracks of the cell bodies in line 10 (130 $\mu\text{m}$  width) in 3 different time-window.

### **Supplemental Figure 4. Behavior of C6 glioma cells on poly-L-lysine coated lines**

C6 glioma cells were plated on lines of Poly-L-Lysine of 200  $\mu\text{m}$  width connected to a large reservoir. Cells were imaged after 1h seeding for long periods of time in phase contrast using a 10X objective (1 image/6min). Top: Reconstitution of the entire pattern at the end of the movie (24h). (a-d) zooms of various regions in the reservoirs and lines showing the same perpendicular alignment.

### **Supplemental Figure 5. Phospho-myosin light chain 2 and GFP-mDia2 localization in C6 glioma cells.**

(A) Confocal images of glioma cells migrating on 20 $\mu\text{m}$  lines fixed and stained for phospho-myosin light chain 2 (Ser19) (green), Phalloidin (red) and dapi (blue). Bar is 10 $\mu\text{m}$ . (B) Confocal images of glioma cells seeded on laminin coated glass bottom dish. Panels a-c show a dividing cell with a typical staining of active myosin at the contractile ring (arrow). Panels d-g show a migrating cell with stress fibers decorated with phospho-myosin. (C) Confocal images of glioma cells expressing GFP-mDia2 on 3  $\mu\text{m}$  line fixed and stained with Phalloidin (red) and dapi (blue).

### **Supplemental Figure 6. Knock down of formins in human GPCs**

(A-E) Human Glioma propagating cells were transfected with shRNA targeting mDia1, mDia2 and FHOD3. 3 days later, transfected cells were seeded on 7  $\mu\text{m}$  laminin micropatterned lines

and tested for effective knock down. **(A-C)** Expression of mDia1, mDia2 and FHOD3 in shRNA transfected cells was examined by western blotting with antibodies against mDia1, mDia2 and FHOD3.  $\alpha$ -Tubulin was used as a loading control. **(D)** Quantification of the formin expression in the respective knock down in hGPCs corresponding to western blot in A,B,C. **(E)** Average of mean speeds of transfected hGPCs and migrating on 7  $\mu$ m laminin micropatterned lines reported to the speed of control cells (%). Error bars are S.E.M. P-values were calculated using unpaired t-tests. **(F)** Quantification of the formin expression in the respective knock down in rat C6 glioma cells corresponding to western blot showed in figure 7C-E. **(G)** Mean speeds of C6 glioma cells transfected with shRNAs against mDia1, mDia2 and FHOD3 and migrating on 2D surfaces were measured and sorted in 3 different classes: Immobile cells (mean speed < 10  $\mu$ m/h), slow cells (10 < mean speed < 20 $\mu$ m/h) and fast cells (>20 $\mu$ m/h).

**Supplemental Figure 7. GFP-FHOD3 overexpressing cells display excessive amounts of longitudinal actin bundles.**

C6 glioma cells were transfected with GFP-FHOD3, seeded on laminin coated 2D-substrates, fixed and stained with phalloidin (red) and Dapi (blue) and imaged using a confocal microscope. **(A)** Typical GFP-FHOD3 transfected cell displaying parallel actin filaments co-stained with GFP-FHOD3. **(B-C)** GFP-FHOD3 overexpressing cells (\*) among un-transfected cells display excessive amounts of longitudinal actin bundles. Scale bars = 10  $\mu$ m.

**A**

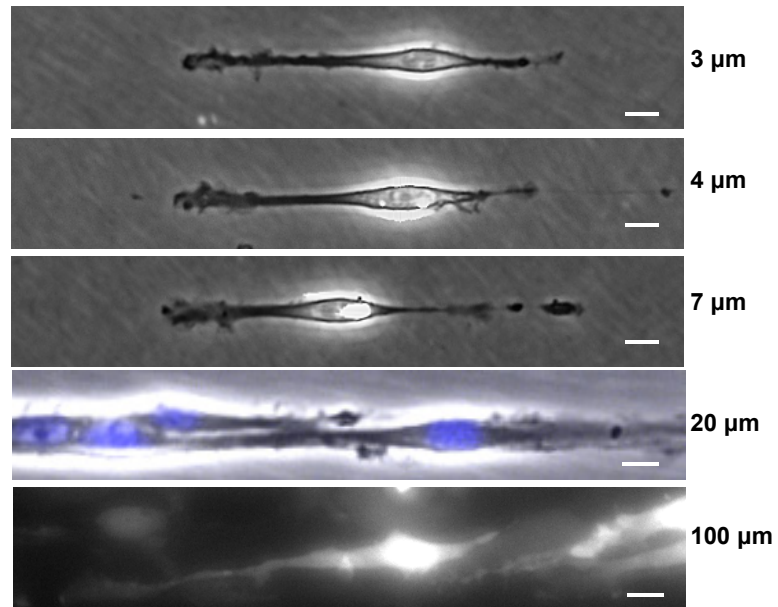

**B**

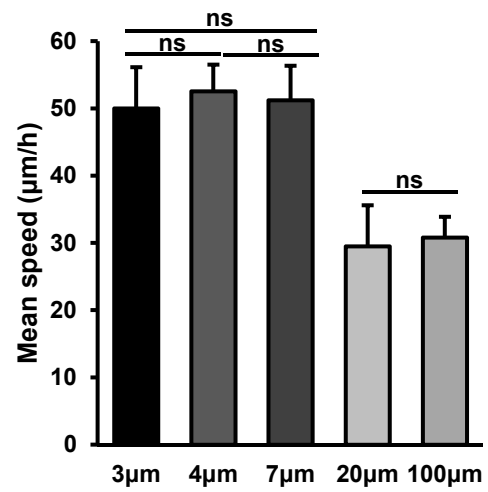

**Supplemental Figure 1**

**A**

Tail retraction

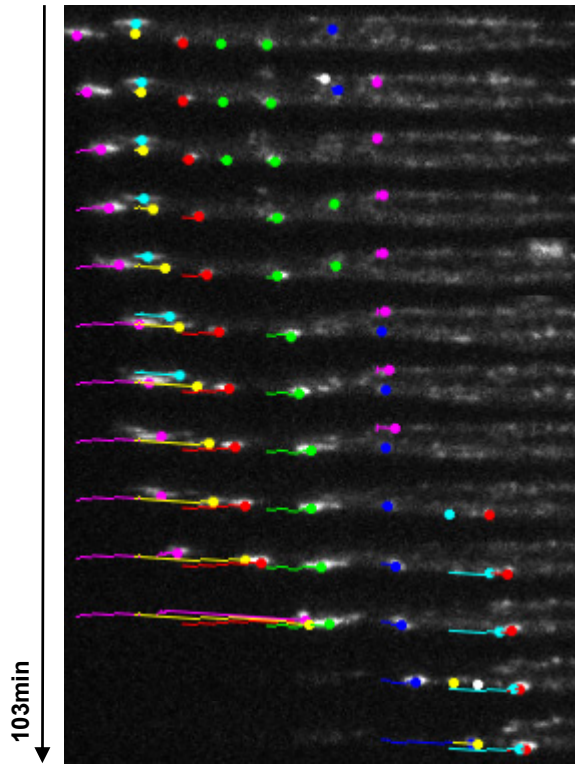

**C**

Adhesion track projection

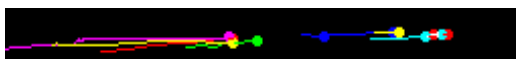

**B**

Leading front

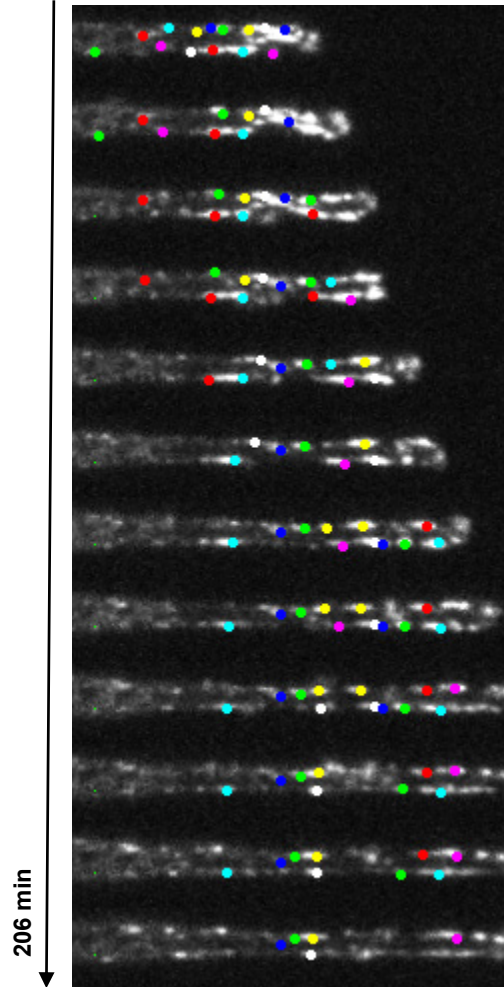

**D**

Adhesion track projection

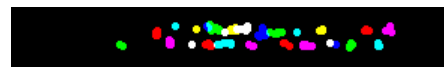

Supplemental Figure 2

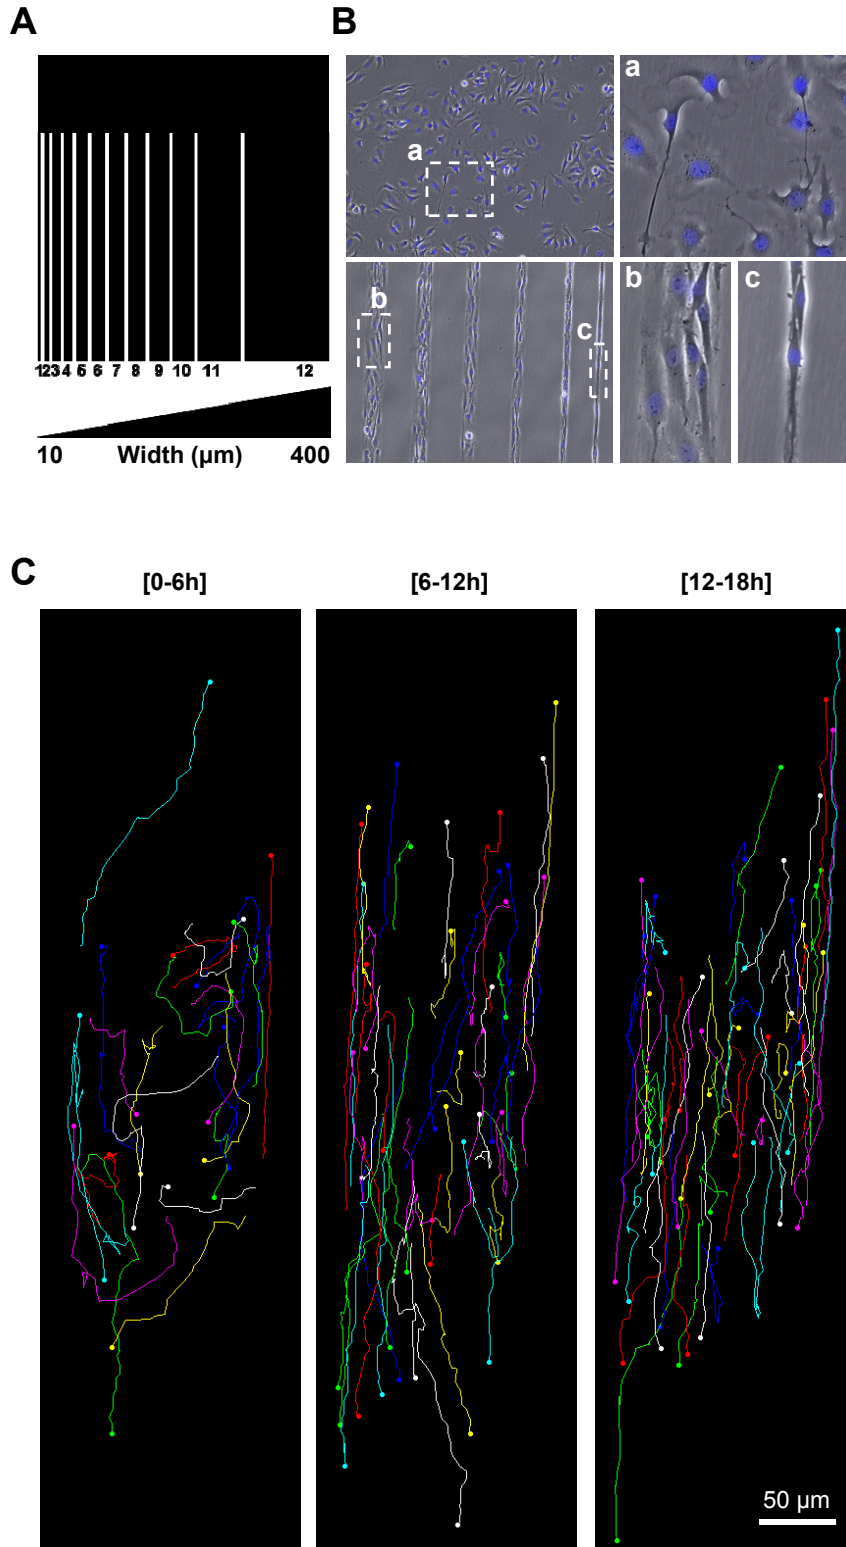

Supplemental Figure 3

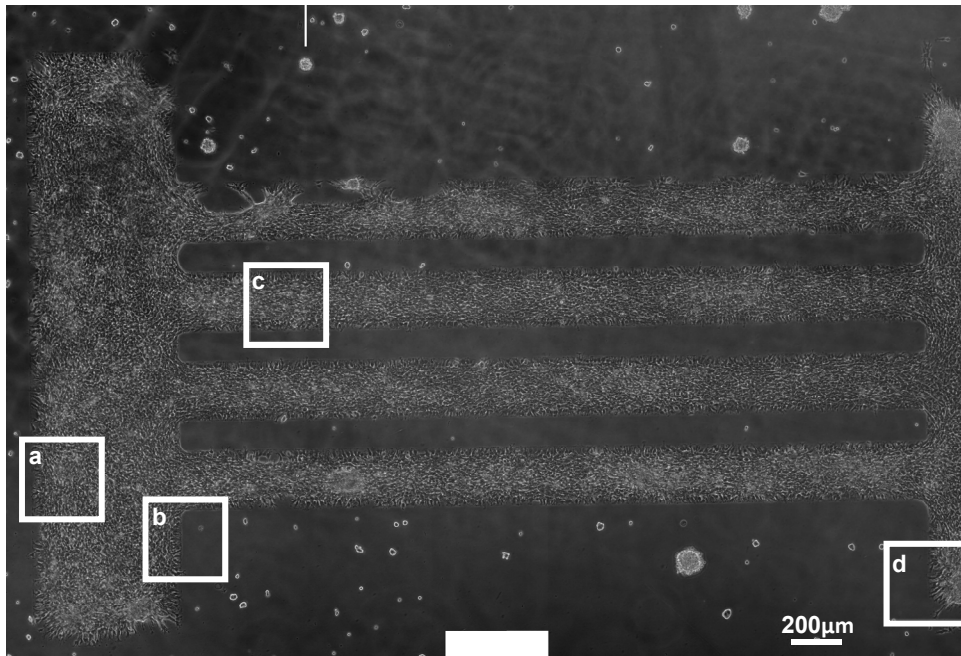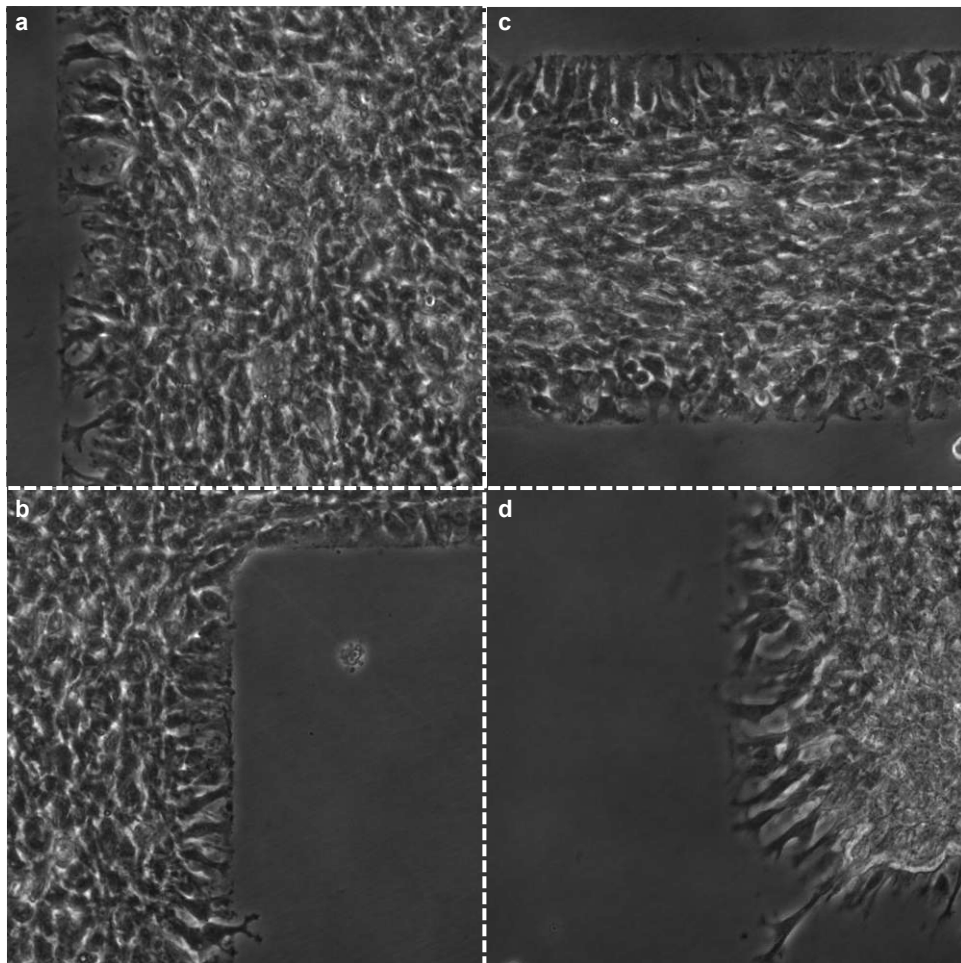

**Supplemental Figure 4**

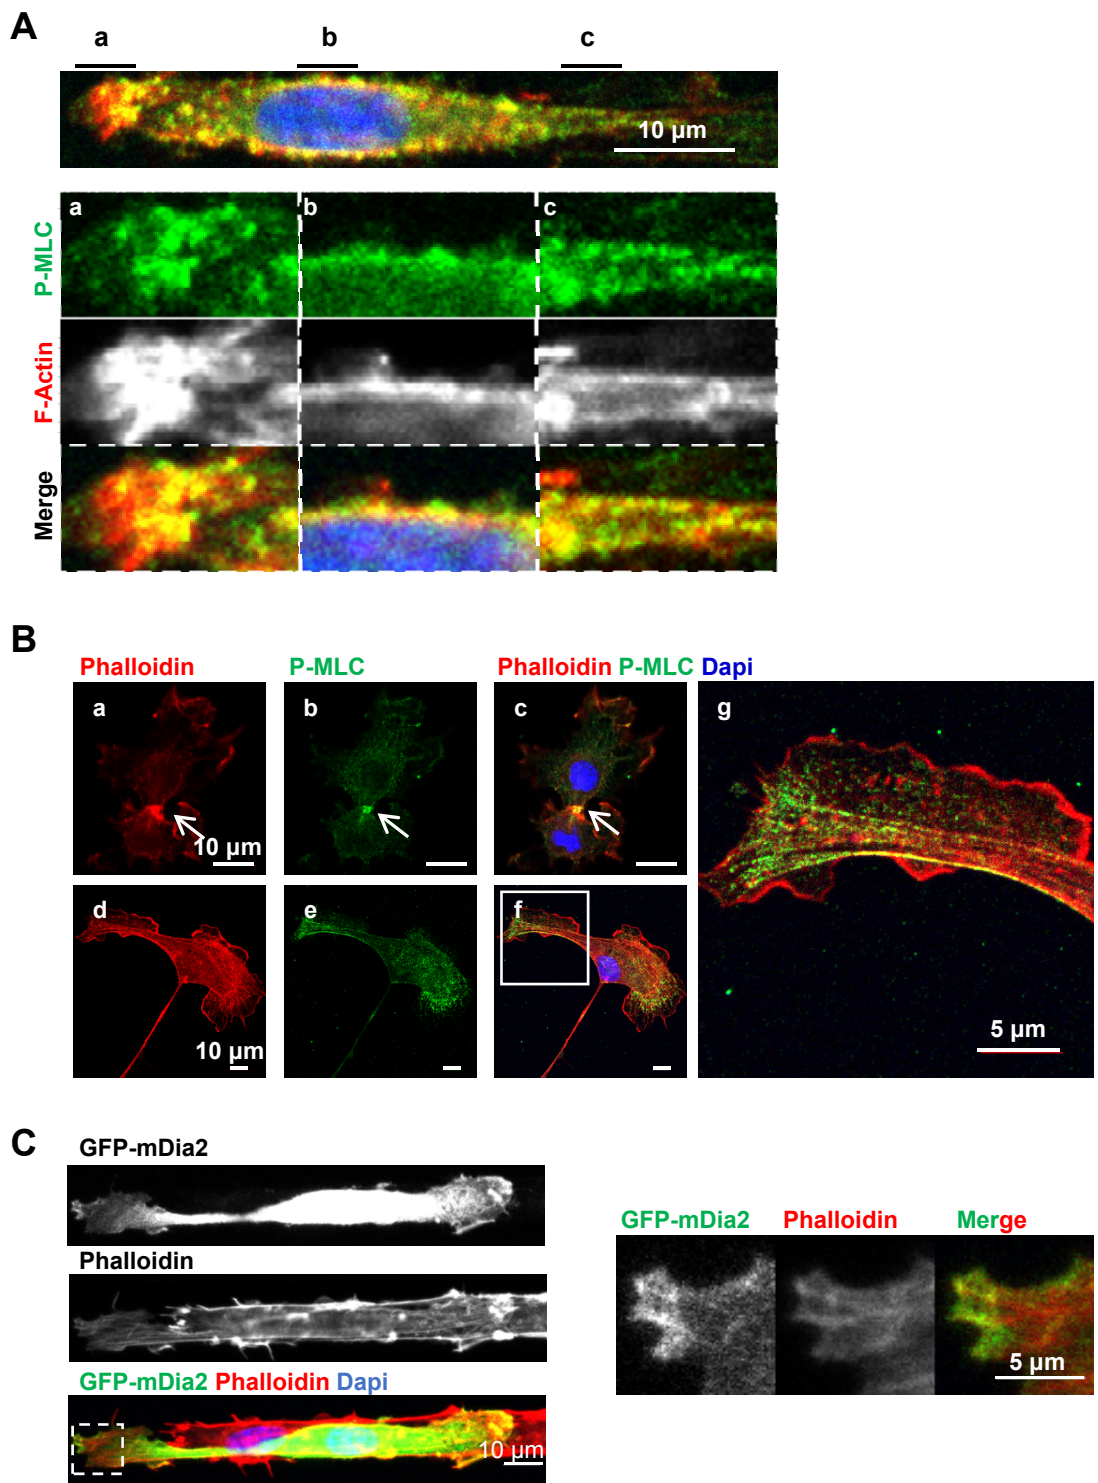

Supplemental Figure 5



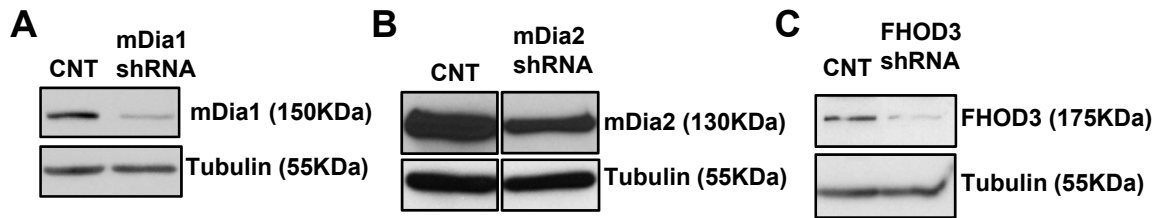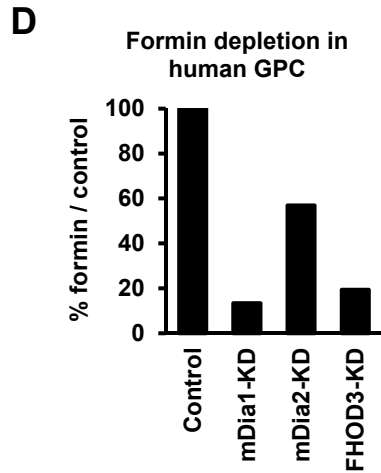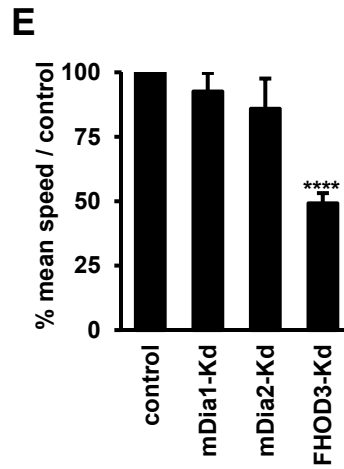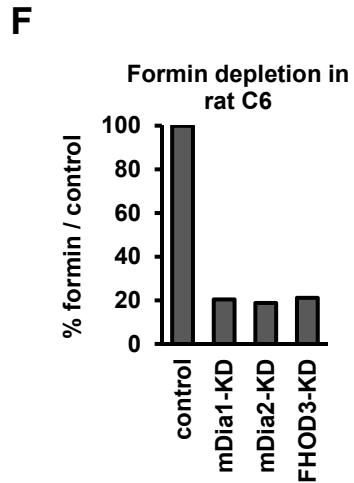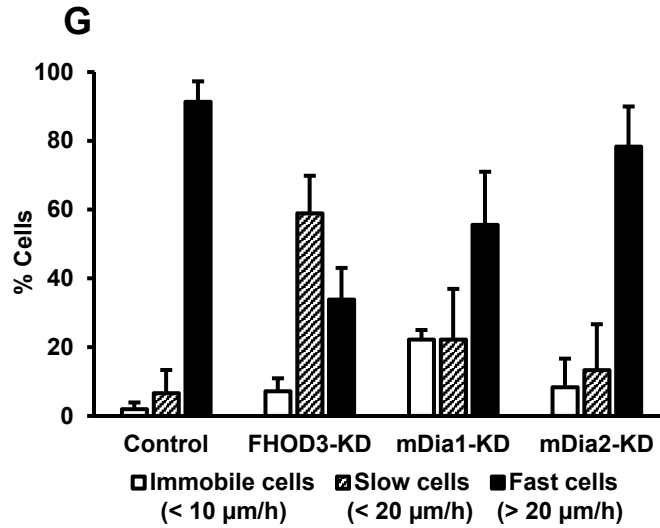

Supplemental Figure 6

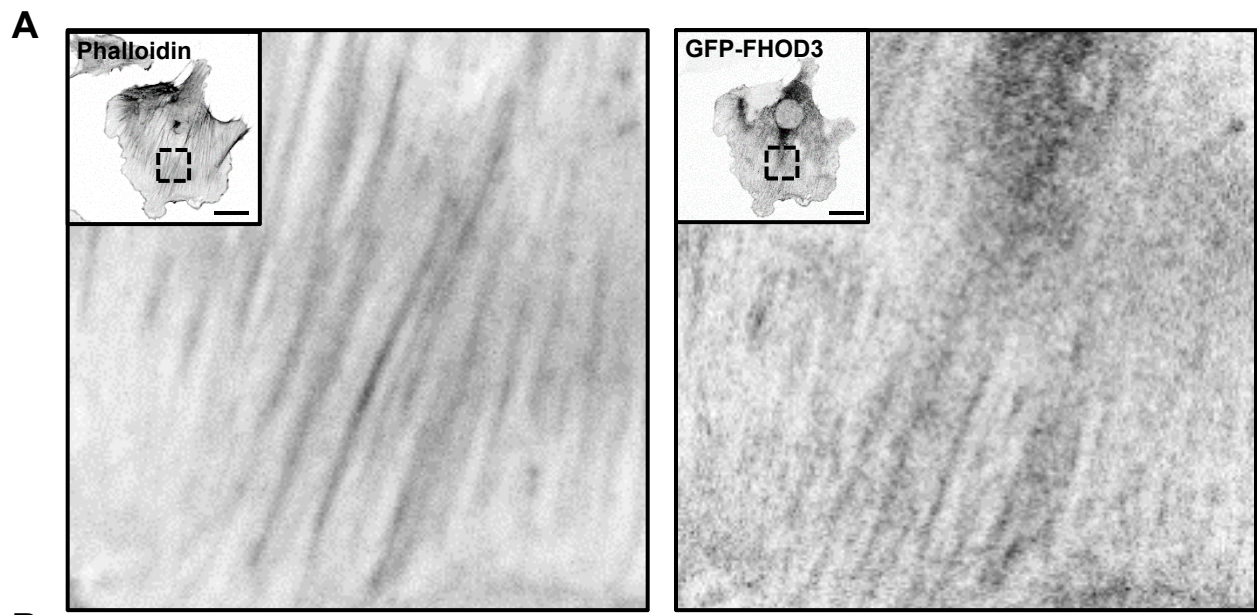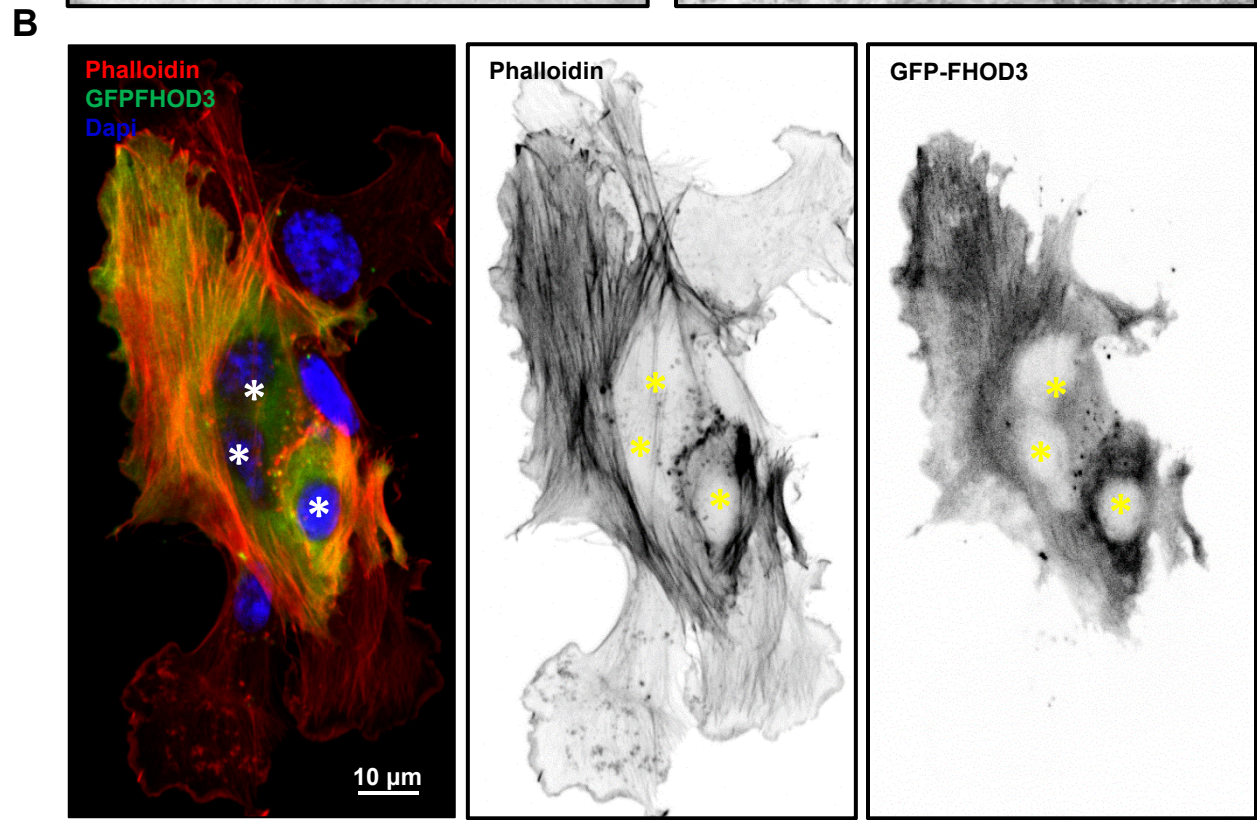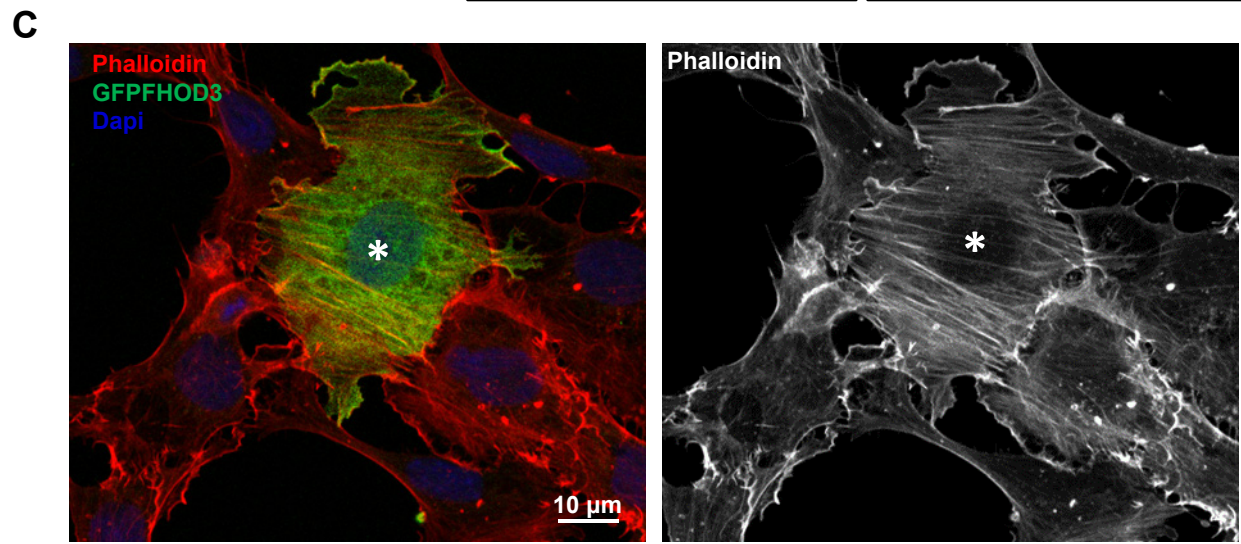

Supplemental Figure 7
